# Supplementary material for: A Modeling Approach to Explain Mutually Exclusive and Co-Occurring Genetic Alterations in Bladder Tumorigenesis
Source: Oxford University Press journal article supplement (doi:10.1158/0008-5472.can-15-0602), 2015-08-03
Supplement: 00085472can150602-sup-146088_1_supp_3006761_npf8pl.xlsx [file 00085472can150602-sup-146088_1_supp_3006761_npf8pl.xlsx]

## Sheet: CITdata
	samples	grade73	stage	invasive	FGFR3mut	RASmut	TP53mut	PIK3CAmut	CCND1_CN	MDM2_CN	E2F3_CN	EGFR_CN	RBL2_CN	CDKN2A_CN	RB1_CN
	CIT1	G3	T4	1	0	0	1	0	1	0	1	1	-1	-2	-1
	CIT100	G3	T3	1	0	0	0	0	1	2	0	1	0	-1	0
	CIT102	G3	T1	0	0	0	0	0	0	0	0	0	0	0	0
	CIT103	G3	T2	1	0	0	1	0	0	0	1	0	0	-1	-2
	CIT105	G3	T1	0	0	0	0	0	1	0	2	0	0	-1	0
	CIT106	G3	T4	1	0	0	0	0	0	0	1	0	-1	0	0
	CIT107	G3	T1	0	0	0	0	0	1	1	0	0	-1	-1	-2
	CIT108	G3	T3	1	0	0	1	0	1	0	2	0	0	0	1
	CIT112	G3	T1	0	0	0	0	0	1	0	0	0	0	-1	0
	CIT12	G3	T3	1	1	0	1	1	0	0	0	0	0	-2	0
	CIT120	G3	T2	1	0	0	1	0	1	0	1	1	1	0	-1
	CIT127	G3	T2	1	0	0	0	0	0	0	0	0	-1	0	0
	CIT129	G3	T1	0	0	0	1	0	2	0	0	0	0	-2	0
	CIT130	G3	T1	0	0	0	0	0	2	0	0	1	0	-1	0
	CIT134	G3	T2	1	0	0	1	0	0	-1	0	0	0	0	-1
	CIT135	G3	T1	0	1	0	0	0	0	2	0	0	0	-1	0
	CIT138	G3	T3	1	0	1	0	0	0	1	0	0	0	-1	0
	CIT139	G3	T2	1	0	0	1	0	1	2	2	1	0	0	0
	CIT14	G3	T3	1	0	0	0	0	0	0	1	0	0	0	-1
	CIT141	G3	T2	1	0	0	1	0	0	0	0	2	-1	-1	-1
	CIT142	G3	T2	1	0	0	0	0	1	2	1	-1	-1	0	-2
	CIT148	G2	Ta	0	1	0	0	0	0	0	0	0	0	0	0
	CIT15	G3	T3	1	0	0	0	0	0	0	-1	0	1	-1	0
	CIT150	G1	Ta	0	0	0	0	0	0	0	0	0	0	0	0
	CIT151	G3	Ta	0	1	0	0	0	0	0	0	0	0	0	0
	CIT153	G3	T1	0	1	0	0	0	-1	0	0	0	0	0	0
	CIT155	G3	T1	0	0	0	1	0	1	0	0	0	0	-1	-2
	CIT156	G3	T1	0	0	0	1	0	1	0	2	0	-1	0	0
	CIT169	G3	Ta	0	0	0	1	0	0	0	0	0	0	0	0
	CIT17	G3	T3	1	0	0	0	0	0	0	0	0	0	-1	0
	CIT170	G2	T2	1	0	0	0	0	1	2	0	0	0	-1	0
	CIT171	G3	T1	0	0	0	0	0	2	1	0	0	0	-2	0
	CIT172	G3	T2	1	0	1	1	0	1	1	1	1	0	0	0
	CIT175	G3	T2	1	0	0	1	0	1	1	0	1	0	-1	0
	CIT177	G2	T4	1	0	0	1	0	2	0	0	0	-1	-1	0
	CIT178	G2	Ta	0	1	0	0	0	0	0	0	0	0	0	0
	CIT179	G3	T4	1	0	0	0	0	1	0	0	0	0	0	0
	CIT180	G2	T4	1	0	0	0	0	2	1	-1	0	1	-2	-1
	CIT181	G3	T2	1	0	0	1	0	-1	-1	1	1	0	1	-1
	CIT182	G3	T2	1	0	0	0	0	1	1	2	1	0	1	0
	CIT185	G3	T2	1	0	0	1	0	0	0	1	0	-1	0	0
	CIT186	G3	T4	1	0	0	0	0	0	0	0	0	0	0	0
	CIT187	G3	T3	1	0	0	0	0	0	0	0	0	0	0	0
	CIT188	G3	T4	1	0	1	0	0	1	0	0	1	0	-2	0
	CIT19	G3	T3	1	0	0	1	0	0	0	1	1	0	0	-1
	CIT190	G3	T3	1	0	0	1	0	0	0	2	1	0	0	0
	CIT192	G3	T2	1	0	0	0	1	1	-1	1	1	-1	0	1
	CIT193	G2	Ta	0	0	1	0	0	0	0	0	1	0	-1	-1
	CIT194	G1	Ta	0	0	0	0	0	0	0	0	-1	0	0	0
	CIT199	G2	T1	0	1	0	0	0	0	0	0	0	0	0	0
	CIT2	G3	T4	1	0	0	0	0	0	0	0	0	0	0	0
	CIT202	G3	T1	0	1	0	0	0	0	0	0	-1	0	-1	0
	CIT209	G2	Ta	0	1	0	0	0	0	0	0	0	0	0	0
	CIT215	G2	Ta	0	1	0	0	0	0	0	0	0	0	-1	0
	CIT218	G2	Ta	0	1	0	0	1	1	0	0	0	0	-2	1
	CIT219	G1	Ta	0	0	1	0	0	1	0	0	0	0	0	0
	CIT220	G2	Ta	0	1	0	0	0	0	0	0	0	0	0	0
	CIT221	G1	Ta	0	1	0	0	1	0	0	0	0	0	0	0
	CIT23	G3	T3	1	0	0	1	0	1	0	2	-1	-1	0	-1
	CIT239	G2	Ta	0	1	0	0	0	0	0	0	0	0	0	0
	CIT240	G2	Ta	0	1	0	0	0	1	0	0	0	0	0	0
	CIT241	G2	Ta	0	1	0	1	0	0	0	0	0	0	0	0
	CIT242	G3	T4	1	0	0	0	0	0	0	0	0	-1	0	-2
	CIT244	G3	T1	0	0	0	1	0	1	0	1	1	1	0	0
	CIT247	G2	Ta	0	0	0	0	0	0	0	0	0	0	0	0
	CIT249	G2	Ta	0	1	0	0	0	0	0	0	0	0	0	-1
	CIT25	G3	T3	1	0	0	0	0	0	1	0	0	0	0	0
	CIT250	G3	Ta	0	0	0	0	0	0	2	0	0	0	1	0
	CIT251	G2	Ta	0	1	0	0	0	0	1	0	0	0	-1	0
	CIT252	G3	T2	1	0	0	0	0	0	0	0	0	0	0	0
	CIT253	G2	T3	1	1	0	0	0	0	0	1	0	0	-1	-1
	CIT254	G3	T3	1	0	0	0	0	0	1	1	0	0	0	0
	CIT255	G2	Ta	0	1	0	0	1	1	0	1	0	0	-1	0
	CIT256	G3	T2	1	1	0	0	0	1	0	0	-1	1	-2	0
	CIT258	G3	Ta	0	1	0	0	0	1	0	0	0	-1	-2	0
	CIT259	G3	T2	1	0	0	1	0	1	1	2	1	0	-1	0
	CIT26	G3	T3	1	0	0	0	0	0	0	0	0	0	0	0
	CIT260	G3	T3	1	0	0	1	0	0	0	0	0	0	0	0
	CIT262	G3	T3	1	0	0	0	0	1	0	0	2	-1	-1	-1
	CIT263	G2	Ta	0	1	0	0	0	0	0	0	1	0	-2	1
	CIT265	G3	T3	1	0	0	1	0	2	0	1	1	0	-1	1
	CIT266	G3	T3	1	0	0	1	0	-1	-1	-1	-1	-1	0	-1
	CIT267	G2	T2	1	0	0	1	0	0	1	0	1	0	-1	-1
	CIT268	G3	T3	1	0	0	1	0	0	0	0	0	-1	0	-1
	CIT269	G2	T3	1	0	0	1	0	2	0	0	0	0	0	-1
	CIT270	G1	Ta	0	1	0	0	0	0	0	0	0	0	-1	0
	CIT272	G2	Ta	0	1	0	0	0	0	0	0	0	0	0	0
	CIT273	G3	T1	0	0	0	0	0	0	1	0	0	-1	-1	0
	CIT274	G2	T1	0	0	0	0	0	0	0	0	0	0	0	0
	CIT275	G3	T1	0	0	0	1	0	1	0	0	0	0	0	-1
	CIT276	G3	T1	0	1	0	1	0	0	0	0	0	0	0	0
	CIT277	G3	T2	1	0	0	1	0	2	0	0	0	0	0	-1
	CIT28	G3	T3	1	0	0	1	0	-1	0	1	0	0	0	0
	CIT280	G3	T2	1	0	1	0	0	0	1	1	0	0	-1	0
	CIT281	G3	T1	0	0	0	0	0	1	1	0	0	0	0	0
	CIT282	G3	T1	0	0	0	0	0	2	0	0	0	-1	-2	0
	CIT283	G3	T1	0	0	0	0	0	0	0	0	0	0	-2	0
	CIT285	G2	Ta	0	1	0	0	0	0	0	0	0	0	0	0
	CIT286	G3	T1	0	0	0	0	0	1	0	0	-1	-2	-1	-1
	CIT288	G3	T1	0	0	1	1	0	0	0	0	0	0	0	0
	CIT289	G3	T1	0	0	0	0	0	0	0	1	0	0	0	0
	CIT290	G3	T2	1	0	0	0	0	1	1	1	0	0	-1	0
	CIT292	G2	T4	1	0	0	0	0	0	0	-1	0	0	-1	0
	CIT293	G2	T1	0	1	0	0	0	1	0	0	0	-1	-1	0
	CIT294	G3	T1	0	0	1	0	0	1	0	0	0	-1	0	0
	CIT299	G3	Ta	0	1	0	0	0	0	0	0	0	0	0	0
	CIT30	G3	T3	1	0	0	0	0	0	0	1	0	0	0	0
	CIT300	G2	Ta	0	1	0	0	0	0	0	0	0	0	0	0
	CIT301	G2	Ta	0	1	0	0	0	0	0	0	0	0	0	0
	CIT302	G1	Ta	0	1	0	0	0	0	0	0	0	0	0	-1
	CIT303	G2	Ta	0	1	0	0	0	0	0	0	0	0	-2	0
	CIT304	G3	T1	0	1	0	0	0	0	0	0	0	0	0	0
	CIT308	G3	T1	0	0	0	1	0	-1	0	2	-1	-1	0	0
	CIT31	G3	T4	1	0	0	1	0	1	0	0	1	0	-2	0
	CIT310	G3	T2	1	0	0	0	0	2	2	0	0	0	-1	0
	CIT311	G2	Ta	0	1	0	0	0	0	0	0	0	0	0	0
	CIT314	G2	Ta	0	1	0	0	0	0	0	0	0	0	0	-1
	CIT316	G1	Ta	0	0	0	0	0	0	0	0	0	0	0	0
	CIT318	G2	Ta	0	1	0	0	0	0	0	0	0	1	-2	0
	CIT32	G3	T3	1	0	0	1	0	0	0	0	0	0	-1	0
	CIT323	G2	Ta	0	0	0	0	0	0	0	0	0	0	0	0
	CIT33	G3	T2	1	0	0	0	0	0	0	0	0	0	0	0
	CIT34	G3	T2	1	0	0	1	0	1	0	0	0	0	0	-1
	CIT344	G2	Ta	0	0	1	0	0	0	0	0	0	0	0	0
	CIT345	G2	Ta	0	1	0	0	1	0	0	0	0	0	0	0
	CIT346	G2	Ta	0	1	0	0	0	0	0	0	1	0	0	0
	CIT347	G2	Ta	0	1	0	0	0	1	0	0	0	0	-1	0
	CIT348	G1	Ta	0	1	0	0	0	-1	0	0	0	0	0	0
	CIT349	G2	Ta	0	1	0	0	1	0	0	0	-1	0	-1	0
	CIT352	G1	Ta	0	0	1	0	0	0	0	0	0	0	0	0
	CIT353	G1	Ta	0	1	0	0	1	0	0	0	0	0	0	0
	CIT354	G2	Ta	0	1	0	0	0	1	1	0	0	0	-1	-1
	CIT36	G3	T2	1	0	0	1	0	1	1	1	1	0	0	0
	CIT37	G3	T4	1	0	0	0	0	0	2	0	0	0	0	0
	CIT38	G3	T2	1	0	0	1	0	0	0	1	2	0	0	0
	CIT39	G3	T2	1	1	0	1	0	0	0	0	1	0	-2	1
	CIT40	G3	T2	1	0	0	1	0	1	-1	1	1	-1	1	-1
	CIT43	G3	T2	1	1	0	0	0	1	0	1	1	1	-1	1
	CIT46	G3	T1	0	0	0	0	0	2	1	0	0	0	-1	0
	CIT47	G3	T1	0	1	0	0	0	1	0	0	0	0	0	0
	CIT50	G3	T1	0	1	0	1	0	1	0	0	1	0	-1	0
	CIT53	G2	Ta	0	1	0	0	0	0	0	0	0	0	-1	0
	CIT54	G2	T1	0	1	0	0	0	0	1	0	1	1	-2	0
	CIT55	G3	Ta	0	0	0	0	1	0	0	0	0	0	0	0
	CIT56	G3	T1	0	1	0	0	0	0	0	0	0	-1	-2	0
	CIT6	G2	T4	1	0	0	0	0	0	0	-1	0	0	-1	0
	CIT60	G2	T1	0	1	0	1	0	0	0	0	0	0	-2	0
	CIT62	G3	T1	0	0	0	0	1	1	0	0	0	0	-1	0
	CIT64	G3	T1	0	1	0	0	0	0	2	0	0	0	0	1
	CIT65	G3	T2	1	0	0	0	0	0	0	-1	1	1	-2	1
	CIT67	G3	T3	1	1	0	1	0	0	0	0	1	0	-2	0
	CIT68	G2	T4	1	1	0	0	0	0	0	0	0	0	-2	0
	CIT7	G3	T4	1	0	0	1	0	0	-1	-1	1	0	-2	0
	CIT70	G3	T3	1	0	0	1	0	0	0	0	1	-1	-1	0
	CIT72	G3	T3	1	0	0	1	0	0	0	0	2	0	-1	0
	CIT73	G3	T3	1	0	0	1	0	-1	0	0	0	0	-2	0
	CIT74	G3	T1	0	0	1	0	0	0	1	0	0	0	0	0
	CIT75	G3	T3	1	0	1	0	0	0	-1	-1	0	-1	-2	0
	CIT76	G3	T4	1	0	0	0	1	1	1	1	-1	0	-2	0
	CIT78	G3	T3	1	0	0	1	1	-1	0	2	0	-1	0	-1
	CIT79	G3	T2	1	0	0	0	0	1	0	0	0	0	0	0
	CIT8	G3	T4	1	0	0	0	0	1	2	1	1	0	-1	-1
	CIT80	G3	T3	1	0	0	1	0	1	1	0	1	1	-1	0
	CIT81	G3	T3	1	0	0	1	1	0	0	0	0	0	-2	0
	CIT82	G3	T3	1	0	0	1	0	0	-1	1	1	0	-2	-1
	CIT83	G3	T3	1	0	0	0	0	0	0	0	0	-1	0	0
	CIT84	G3	T4	1	0	0	1	0	1	0	2	1	1	1	-1
	CIT85	G2	Ta	0	0	0	0	0	2	0	0	0	0	-2	-1
	CIT86	G2	Ta	0	1	0	0	1	0	0	0	0	0	0	0
	CIT90	G3	T1	0	0	0	0	0	0	1	1	0	0	-1	0
	CIT91	G3	T2	1	0	0	0	0	0	1	0	0	0	0	0
	CIT92	G2	T1	0	1	0	0	0	1	0	0	0	0	-2	0
	CIT93	G3	T3	1	0	0	0	0	1	0	0	0	0	0	-2
	CIT94	G2	Ta	0	1	0	1	1	0	0	1	0	-1	-2	1
	CIT96	G3	T3	1	0	0	1	0	1	0	1	0	0	-1	0
	CIT97	G3	T3	1	1	0	1	0	1	0	0	0	-1	0	0
	CIT98	G3	T1	0	0	0	0	0	-1	2	1	-1	-1	0	0
	CIT99	G2	T4	1	1	0	0	1	-1	0	-1	0	0	-2	0

## Sheet: Survival_data
	Note 1: For computations of model phenotype probabilities, we only considered mutations, amplifications (2) and not gains (1), and homozygous losses (-2) and not heterozygous losses (-1)
	Note 2: Survival info for 163 patients out of 178 patients
	Note 3: Results of analysis of association to survival with: (1) the model phenotypes (Prolif, Growth_arrest, Apoptosis) gives p-value=0.029; (2) the raw mutational profile gives p-value=0.00931
	samples_anonymous	Survival information					Model phenotypes					Data
		Follow-up_time_(months)	Last_known_status	Status	Recurrence	Progression	Null	Prolif	Growth_arrest	Apoptosis	oscil	invasive	FGFR3mut	RASmut	TP53mut	PIK3CAmut	CCND1_CN	MDM2_CN	E2F3_CN	EGFR_CN	RBL2_CN	CDKN2A_CN	RB1_CN
	CIT100	15	Death_from_cancer	1	no	yes	0	0.14388	0.606062	0.1875	0.0625	1	0	0	0	0	1	2	0	1	0	-1	0
	CIT102	9	Alive_tumour-free	0	yes	no	0	0.143431	0.294069	0.5	0.0625	0	0	0	0	0	0	0	0	0	0	0	0
	CIT103	54	Alive_tumour-free	0	no	no	0	0.141625	0.608375	0.1875	0.0625	1	0	0	1	0	0	0	1	0	0	-1	-2
	CIT106	12	Death_from_cancer	1	no	yes	0	0.143431	0.294069	0.5	0.0625	1	0	0	0	0	0	0	1	0	-1	0	0
	CIT107	114	Alive_tumour-free	0	no	no	0	0.141169	0.296331	0.5	0.0625	0	0	0	0	0	1	1	0	0	-1	-1	-2
	CIT108	70	Alive_tumour-free	0	no	no	0	0.332244	0.480256	0.1875	0	1	0	0	1	0	1	0	2	0	0	0	1
	CIT112	133	Alive_tumour-free	0	yes	no	0	0.143431	0.294069	0.5	0.0625	0	0	0	0	0	1	0	0	0	0	-1	0
	CIT12	26	Death_from_cancer	1	no	yes	0	0.5	0	0.5	0	1	1	0	1	1	0	0	0	0	0	-2	0
	CIT120	107	Alive_tumour-free	0	no	no	0	0.1439	0.6061	0.1875	0.0625	1	0	0	1	0	1	0	1	1	1	0	-1
	CIT129	41	Alive	0	no	no	0	0.242938	0.444563	0.25	0.0625	0	0	0	1	0	2	0	0	0	0	-2	0
	CIT130	39	Alive	0	no	no	0.0625	0.240706	0.134294	0.5	0.0625	0	0	0	0	0	2	0	0	1	0	-1	0
	CIT134	13	Alive_with_cancer	0	no	no	0	0.1439	0.6061	0.1875	0.0625	1	0	0	1	0	0	-1	0	0	0	0	-1
	CIT135	57	Alive_tumour-free	0	yes	no	0	0.289225	0.460775	0.25	0	0	1	0	0	0	0	2	0	0	0	-1	0
	CIT138	3	Death_from_cancer	1	no	yes	0	0.39645	0.10355	0.5	0	1	0	1	0	0	0	1	0	0	0	-1	0
	CIT139	10	Death	1	no	no	0	0.428825	0.39237	0.1875	0	1	0	0	1	0	1	2	2	1	0	0	0
	CIT14	4	Death_from_cancer	1	no	yes	0	0.143431	0.294069	0.5	0.0625	1	0	0	0	0	0	0	1	0	0	0	-1
	CIT141	6	Alive_with_cancer	0	no	yes	0	0.315831	0.434169	0.25	0	1	0	0	1	0	0	0	0	2	-1	-1	-1
	CIT142	69	Alive	0	yes	no	0	0.14196	0.608003	0.1875	0.0625	1	0	0	0	0	1	2	1	-1	-1	0	-2
	CIT148	7.1	Alive_tumour-free	0	yes	no	0	0.2891	0.2109	0.5	0	0	1	0	0	0	0	0	0	0	0	0	0
	CIT15	53	Alive_tumour-free	0	no	no	0	0.143431	0.294069	0.5	0.0625	1	0	0	0	0	0	0	-1	0	1	-1	0
	CIT150	39	Alive_tumour-free	0	no	no	0	0.143431	0.294069	0.5	0.0625	0	0	0	0	0	0	0	0	0	0	0	0
	CIT151	50.9	Alive_tumour-free	0	no	no	0	0.2891	0.2109	0.5	0	0	1	0	0	0	0	0	0	0	0	0	0
	CIT153	134.6	Alive_tumour-free	0	no	no	0	0.2891	0.2109	0.5	0	0	1	0	0	0	-1	0	0	0	0	0	0
	CIT155	41	Alive_tumour-free	0	no	no	0	0.141625	0.608375	0.1875	0.0625	0	0	0	1	0	1	0	0	0	0	-1	-2
	CIT156	19	Alive_with_cancer	0	no	no	0	0.332244	0.480256	0.1875	0	0	0	0	1	0	1	0	2	0	-1	0	0
	CIT169	64	Alive_tumour-free	0	no	no	0	0.1439	0.6061	0.1875	0.0625	0	0	0	1	0	0	0	0	0	0	0	0
	CIT17	20	Death_from_cancer	1	no	yes	0	0.143431	0.294069	0.5	0.0625	1	0	0	0	0	0	0	0	0	0	-1	0
	CIT170	1	Alive_with_cancer	0	no	no	0	0.14388	0.606062	0.1875	0.0625	1	0	0	0	0	1	2	0	0	0	-1	0
	CIT171	68	Alive_tumour-free	0	no	no	0.0625	0.3125	0.0625	0.5	0.0625	0	0	0	0	0	2	1	0	0	0	-2	0
	CIT172	72	Alive_tumour-free	0	no	no	0	0.315831	0.25	0.434169	0	1	0	1	1	0	1	1	1	1	0	0	0
	CIT175	0	Alive_with_cancer	0	no	no	0	0.1439	0.6061	0.1875	0.0625	1	0	0	1	0	1	1	0	1	0	-1	0
	CIT177	10	Death_from_cancer	1	no	yes	0.0625	0.243113	0.381887	0.25	0.0625	1	0	0	1	0	2	0	0	0	-1	-1	0
	CIT178	25.7	Alive_tumour-free	0	no	no	0	0.2891	0.2109	0.5	0	0	1	0	0	0	0	0	0	0	0	0	0
	CIT179	13	Death_from_cancer	1	no	yes	0	0.143431	0.294069	0.5	0.0625	1	0	0	0	0	1	0	0	0	0	0	0
	CIT180	3	Alive_with_cancer	0	no	yes	0.0625	0.3125	0.0625	0.5	0.0625	1	0	0	0	0	2	1	-1	0	1	-2	-1
	CIT181	21	Alive_with_cancer	0	no	no	0	0.1439	0.6061	0.1875	0.0625	1	0	0	1	0	-1	-1	1	1	0	1	-1
	CIT182	15	Death_from_cancer	1	no	yes	0	0.329987	0.170013	0.5	0	1	0	0	0	0	1	1	2	1	0	1	0
	CIT185	0	Alive_with_cancer	0	no	no	0	0.1439	0.6061	0.1875	0.0625	1	0	0	1	0	0	0	1	0	-1	0	0
	CIT186	3	Alive_with_cancer	0	no	yes	0	0.143431	0.294069	0.5	0.0625	1	0	0	0	0	0	0	0	0	0	0	0
	CIT187	0	Alive_tumour-free	0	no	no	0	0.143431	0.294069	0.5	0.0625	1	0	0	0	0	0	0	0	0	0	0	0
	CIT188	4	Death_from_cancer	1	no	yes	0	0.424625	0.07535	0.5	0	1	0	1	0	0	1	0	0	1	0	-2	0
	CIT19	40	Alive_tumour-free	0	no	no	0	0.1439	0.6061	0.1875	0.0625	1	0	0	1	0	0	0	1	1	0	0	-1
	CIT190	43	Death_from_cancer	1	no	yes	0	0.332244	0.480256	0.1875	0	1	0	0	1	0	0	0	2	1	0	0	0
	CIT192	19	Alive_with_cancer	0	no	yes	0.0625	0.219469	0.218031	0.5	0	1	0	0	0	1	1	-1	1	1	-1	0	1
	CIT194	19	Alive_tumour-free	0	yes	no	0	0.143431	0.294069	0.5	0.0625	0	0	0	0	0	0	0	0	-1	0	0	0
	CIT199	72	Alive_tumour-free	0	yes	yes	0	0.2891	0.2109	0.5	0	0	1	0	0	0	0	0	0	0	0	0	0
	CIT2	60	Alive_tumour-free	0	no	no	0	0.143431	0.294069	0.5	0.0625	1	0	0	0	0	0	0	0	0	0	0	0
	CIT202	47.7	Alive_tumour-free	0	no	no	0	0.2891	0.2109	0.5	0	0	1	0	0	0	0	0	0	-1	0	-1	0
	CIT209	38.9	Alive_tumour-free	0	yes	no	0	0.2891	0.2109	0.5	0	0	1	0	0	0	0	0	0	0	0	0	0
	CIT215	22.7	Alive_tumour-free	0	no	no	0	0.2891	0.2109	0.5	0	0	1	0	0	0	0	0	0	0	0	-1	0
	CIT218	33.9	Alive_tumour-free	0	yes	no	0	0.5	0	0.5	0	0	1	0	0	1	1	0	0	0	0	-2	1
	CIT219	46	Alive_tumour-free	0	no	no	0	0.39645	0.10355	0.5	0	0	0	1	0	0	1	0	0	0	0	0	0
	CIT220	58.4	Alive_tumour-free	0	no	no	0	0.2891	0.2109	0.5	0	0	1	0	0	0	0	0	0	0	0	0	0
	CIT221	75.2	Alive_tumour-free	0	yes	no	0	0.322547	0.177453	0.5	0	0	1	0	0	1	0	0	0	0	0	0	0
	CIT23	3	Alive_with_cancer	0	no	no	0	0.332244	0.480256	0.1875	0	1	0	0	1	0	1	0	2	-1	-1	0	-1
	CIT239	137.5	Alive_tumour-free	0	no	no	0	0.2891	0.2109	0.5	0	0	1	0	0	0	0	0	0	0	0	0	0
	CIT240	137.3	Alive_tumour-free	0	no	no	0	0.2891	0.2109	0.5	0	0	1	0	0	0	1	0	0	0	0	0	0
	CIT241	136.3	Alive_tumour-free	0	no	no	0	0.290381	0.459619	0.25	0	0	1	0	1	0	0	0	0	0	0	0	0
	CIT242	15	Death_from_cancer	1	no	no	0	0.141169	0.296331	0.5	0.0625	1	0	0	0	0	0	0	0	0	-1	0	-2
	CIT244	93	Alive_tumour-free	0	no	yes	0	0.1439	0.6061	0.1875	0.0625	0	0	0	1	0	1	0	1	1	1	0	0
	CIT247	59	Alive_tumour-free	0	yes	no	0	0.143431	0.294069	0.5	0.0625	0	0	0	0	0	0	0	0	0	0	0	0
	CIT249	53.4	Alive_tumour-free	0	no	no	0	0.2891	0.2109	0.5	0	0	1	0	0	0	0	0	0	0	0	0	-1
	CIT25	72	Alive_tumour-free	0	no	no	0	0.143431	0.294069	0.5	0.0625	1	0	0	0	0	0	1	0	0	0	0	0
	CIT250	81	Alive_tumour-free	0	no	no	0	0.14388	0.606062	0.1875	0.0625	0	0	0	0	0	0	2	0	0	0	1	0
	CIT251	9.2	Alive_tumour-free	0	no	no	0	0.2891	0.2109	0.5	0	0	1	0	0	0	0	1	0	0	0	-1	0
	CIT252	89	Alive_tumour-free	0	no	no	0	0.143431	0.294069	0.5	0.0625	1	0	0	0	0	0	0	0	0	0	0	0
	CIT253	30	Alive_tumour-free	0	no	no	0	0.2891	0.2109	0.5	0	1	1	0	0	0	0	0	1	0	0	-1	-1
	CIT254	25	Alive_tumour-free	0	no	no	0	0.143431	0.294069	0.5	0.0625	1	0	0	0	0	0	1	1	0	0	0	0
	CIT255	61.2	Death_from_cancer	1	yes	yes	0	0.322547	0.177453	0.5	0	0	1	0	0	1	1	0	1	0	0	-1	0
	CIT256	104	Alive_tumour-free	0	no	no	0	0.315862	0.184138	0.5	0	1	1	0	0	0	1	0	0	-1	1	-2	0
	CIT258	33.1	Alive_tumour-free	0	no	no	0	0.315862	0.184138	0.5	0	0	1	0	0	0	1	0	0	0	-1	-2	0
	CIT259	132	Death	1	NA	NA	0	0.332244	0.480256	0.1875	0	1	0	0	1	0	1	1	2	1	0	-1	0
	CIT26	59	Alive_tumour-free	0	no	no	0	0.143431	0.294069	0.5	0.0625	1	0	0	0	0	0	0	0	0	0	0	0
	CIT262	6	Death_from_cancer	1	no	no	0	0.3128	0.1872	0.5	0	1	0	0	0	0	1	0	0	2	-1	-1	-1
	CIT269	21	Death_from_cancer	1	no	yes	0.0625	0.243113	0.381887	0.25	0.0625	1	0	0	1	0	2	0	0	0	0	0	-1
	CIT270	33.4	Alive_tumour-free	0	yes	no	0	0.2891	0.2109	0.5	0	0	1	0	0	0	0	0	0	0	0	-1	0
	CIT272	25.5	Alive_tumour-free	0	no	no	0	0.2891	0.2109	0.5	0	0	1	0	0	0	0	0	0	0	0	0	0
	CIT273	33	Alive_tumour-free	0	no	no	0	0.143431	0.294069	0.5	0.0625	0	0	0	0	0	0	1	0	0	-1	-1	0
	CIT274	25	Alive_tumour-free	0	no	no	0	0.143431	0.294069	0.5	0.0625	0	0	0	0	0	0	0	0	0	0	0	0
	CIT275	32	Alive_tumour-free	0	no	no	0	0.1439	0.6061	0.1875	0.0625	0	0	0	1	0	1	0	0	0	0	0	-1
	CIT276	25.3	Alive_tumour-free	0	yes	no	0	0.290381	0.459619	0.25	0	0	1	0	1	0	0	0	0	0	0	0	0
	CIT277	0	Alive_with_cancer	0	no	no	0.0625	0.243113	0.381887	0.25	0.0625	1	0	0	1	0	2	0	0	0	0	0	-1
	CIT28	49	Alive_tumour-free	0	no	no	0	0.1439	0.6061	0.1875	0.0625	1	0	0	1	0	-1	0	1	0	0	0	0
	CIT280	30	Alive_with_cancer	0	no	no	0	0.39645	0.10355	0.5	0	1	0	1	0	0	0	1	1	0	0	-1	0
	CIT281	26	Alive_tumour-free	0	no	no	0	0.143431	0.294069	0.5	0.0625	0	0	0	0	0	1	1	0	0	0	0	0
	CIT282	26	Alive_tumour-free	0	no	no	0.0625	0.3125	0.0625	0.5	0.0625	0	0	0	0	0	2	0	0	0	-1	-2	0
	CIT283	0	Alive_with_cancer	0	no	no	0	0.163406	0.211594	0.5	0.125	0	0	0	0	0	0	0	0	0	0	-2	0
	CIT285	26.2	Alive_tumour-free	0	no	no	0	0.2891	0.2109	0.5	0	0	1	0	0	0	0	0	0	0	0	0	0
	CIT286	3	Death_from_cancer	1	no	yes	0	0.181083	0.193883	0.5	0.125	0	0	0	0	0	1	0	0	-1	-2	-1	-1
	CIT288	31	Alive_tumour-free	0	no	no	0	0.315831	0.25	0.434169	0	0	0	1	1	0	0	0	0	0	0	0	0
	CIT289	16	Alive_with_cancer	0	yes	no	0	0.143431	0.294069	0.5	0.0625	0	0	0	0	0	0	0	1	0	0	0	0
	CIT290	2	Alive_with_cancer	0	no	no	0	0.143431	0.294069	0.5	0.0625	1	0	0	0	0	1	1	1	0	0	-1	0
	CIT292	1	Alive_with_cancer	0	yes	no	0	0.143431	0.294069	0.5	0.0625	1	0	0	0	0	0	0	-1	0	0	-1	0
	CIT294	15	Alive_tumour-free	0	no	no	0	0.39645	0.10355	0.5	0	0	0	1	0	0	1	0	0	0	-1	0	0
	CIT299	35.8	Alive_tumour-free	0	no	no	0	0.2891	0.2109	0.5	0	0	1	0	0	0	0	0	0	0	0	0	0
	CIT30	11	Death_from_cancer	1	no	yes	0	0.143431	0.294069	0.5	0.0625	1	0	0	0	0	0	0	1	0	0	0	0
	CIT300	41.9	Alive_tumour-free	0	yes	no	0	0.2891	0.2109	0.5	0	0	1	0	0	0	0	0	0	0	0	0	0
	CIT301	124.7	Alive_tumour-free	0	yes	no	0	0.2891	0.2109	0.5	0	0	1	0	0	0	0	0	0	0	0	0	0
	CIT302	150	Alive_tumour-free	0	yes	no	0	0.2891	0.2109	0.5	0	0	1	0	0	0	0	0	0	0	0	0	-1
	CIT303	150	Alive_tumour-free	0	yes	no	0	0.315862	0.184138	0.5	0	0	1	0	0	0	0	0	0	0	0	-2	0
	CIT304	129.4	Alive_tumour-free	0	no	no	0	0.2891	0.2109	0.5	0	0	1	0	0	0	0	0	0	0	0	0	0
	CIT31	4	Death_from_cancer	1	no	yes	0	0.169665	0.455263	0.25	0.125	1	0	0	1	0	1	0	0	1	0	-2	0
	CIT310	86	Alive	0	NA	NA	0.125	0.308957	0.190977	0.375	0	1	0	0	0	0	2	2	0	0	0	-1	0
	CIT311	114.8	Alive_tumour-free	0	yes	no	0	0.2891	0.2109	0.5	0	0	1	0	0	0	0	0	0	0	0	0	0
	CIT314	141.7	Alive_tumour-free	0	yes	no	0	0.2891	0.2109	0.5	0	0	1	0	0	0	0	0	0	0	0	0	-1
	CIT318	104	Alive_tumour-free	0	no	no	0	0.315862	0.184138	0.5	0	0	1	0	0	0	0	0	0	0	1	-2	0
	CIT32	53	Alive_tumour-free	0	no	no	0	0.1439	0.6061	0.1875	0.0625	1	0	0	1	0	0	0	0	0	0	-1	0
	CIT323	24	Alive_tumour-free	0	no	no	0	0.143431	0.294069	0.5	0.0625	0	0	0	0	0	0	0	0	0	0	0	0
	CIT33	39	Alive_tumour-free	0	no	no	0	0.143431	0.294069	0.5	0.0625	1	0	0	0	0	0	0	0	0	0	0	0
	CIT34	47	Alive_tumour-free	0	no	no	0	0.1439	0.6061	0.1875	0.0625	1	0	0	1	0	1	0	0	0	0	0	-1
	CIT344	111	Alive_tumour-free	0	no	no	0	0.39645	0.10355	0.5	0	0	0	1	0	0	0	0	0	0	0	0	0
	CIT345	50.1	Alive_tumour-free	0	no	no	0	0.322547	0.177453	0.5	0	0	1	0	0	1	0	0	0	0	0	0	0
	CIT346	7.1	Alive_with_cancer	0	no	no	0	0.2891	0.2109	0.5	0	0	1	0	0	0	0	0	0	1	0	0	0
	CIT347	17.4	Alive_tumour-free	0	yes	no	0	0.2891	0.2109	0.5	0	0	1	0	0	0	1	0	0	0	0	-1	0
	CIT348	17.3	Alive_tumour-free	0	no	no	0	0.2891	0.2109	0.5	0	0	1	0	0	0	-1	0	0	0	0	0	0
	CIT349	24.2	Alive_tumour-free	0	no	no	0	0.322547	0.177453	0.5	0	0	1	0	0	1	0	0	0	-1	0	-1	0
	CIT352	26	Alive_tumour-free	0	no	no	0	0.39645	0.10355	0.5	0	0	0	1	0	0	0	0	0	0	0	0	0
	CIT353	14.6	Alive_tumour-free	0	no	no	0	0.322547	0.177453	0.5	0	0	1	0	0	1	0	0	0	0	0	0	0
	CIT354	4.8	Alive_tumour-free	0	no	no	0	0.2891	0.2109	0.5	0	0	1	0	0	0	1	1	0	0	0	-1	-1
	CIT36	44	Alive_tumour-free	0	no	no	0	0.1439	0.6061	0.1875	0.0625	1	0	0	1	0	1	1	1	1	0	0	0
	CIT37	40	Death_from_cancer	1	no	yes	0	0.14388	0.606062	0.1875	0.0625	1	0	0	0	0	0	2	0	0	0	0	0
	CIT39	23	Death_from_cancer	1	no	yes	0	0.326675	0.423325	0.25	0	1	1	0	1	0	0	0	0	1	0	-2	1
	CIT40	6	Death_from_cancer	1	no	yes	0	0.1439	0.6061	0.1875	0.0625	1	0	0	1	0	1	-1	1	1	-1	1	-1
	CIT43	23	Death_from_cancer	1	no	yes	0	0.2891	0.2109	0.5	0	1	1	0	0	0	1	0	1	1	1	-1	1
	CIT46	15	Death_from_cancer	1	no	yes	0.0625	0.240706	0.134294	0.5	0.0625	0	0	0	0	0	2	1	0	0	0	-1	0
	CIT47	41.4	Alive_tumour-free	0	no	no	0	0.2891	0.2109	0.5	0	0	1	0	0	0	1	0	0	0	0	0	0
	CIT50	77.6	Alive_tumour-free	0	yes	no	0	0.290381	0.459619	0.25	0	0	1	0	1	0	1	0	0	1	0	-1	0
	CIT53	89.4	Alive_tumour-free	0	yes	no	0	0.2891	0.2109	0.5	0	0	1	0	0	0	0	0	0	0	0	-1	0
	CIT54	5.3	Alive_tumour-free	0	no	no	0	0.315862	0.184138	0.5	0	0	1	0	0	0	0	1	0	1	1	-2	0
	CIT55	4	Alive_tumour-free	0	no	no	0.0625	0.219469	0.218031	0.5	0	0	0	0	0	1	0	0	0	0	0	0	0
	CIT56	87.1	Alive_tumour-free	0	no	no	0	0.315862	0.184138	0.5	0	0	1	0	0	0	0	0	0	0	-1	-2	0
	CIT6	10	Death_from_cancer	1	no	yes	0	0.143431	0.294069	0.5	0.0625	1	0	0	0	0	0	0	-1	0	0	-1	0
	CIT60	34	Death_from_cancer	1	no	yes	0	0.326675	0.423325	0.25	0	0	1	0	1	0	0	0	0	0	0	-2	0
	CIT62	60	Alive_tumour-free	0	no	no	0.0625	0.219469	0.218031	0.5	0	0	0	0	0	1	1	0	0	0	0	-1	0
	CIT64	41.6	Alive_tumour-free	0	yes	no	0	0.289225	0.460775	0.25	0	0	1	0	0	0	0	2	0	0	0	0	1
	CIT65	13	Alive_with_cancer	0	no	yes	0	0.163406	0.211594	0.5	0.125	1	0	0	0	0	0	0	-1	1	1	-2	1
	CIT67	19	Death_from_cancer	1	no	yes	0	0.326675	0.423325	0.25	0	1	1	0	1	0	0	0	0	1	0	-2	0
	CIT68	33	Alive_with_cancer	0	no	yes	0	0.315862	0.184138	0.5	0	1	1	0	0	0	0	0	0	0	0	-2	0
	CIT7	7	Death_from_cancer	1	no	yes	0	0.169665	0.455263	0.25	0.125	1	0	0	1	0	0	-1	-1	1	0	-2	0
	CIT70	21	Alive_tumour-free	0	no	no	0	0.1439	0.6061	0.1875	0.0625	1	0	0	1	0	0	0	0	1	-1	-1	0
	CIT72	31	Alive_tumour-free	0	no	no	0	0.315831	0.434169	0.25	0	1	0	0	1	0	0	0	0	2	0	-1	0
	CIT73	35	Alive_with_cancer	0	no	yes	0	0.169665	0.455263	0.25	0.125	1	0	0	1	0	-1	0	0	0	0	-2	0
	CIT74	17	Alive_tumour-free	0	no	no	0	0.39645	0.10355	0.5	0	0	0	1	0	0	0	1	0	0	0	0	0
	CIT75	1	Alive_tumour-free	0	no	no	0	0.424625	0.07535	0.5	0	1	0	1	0	0	0	-1	-1	0	-1	-2	0
	CIT76	16	Death_from_cancer	1	no	yes	0.125	0.375	0	0.5	0	1	0	0	0	1	1	1	1	-1	0	-2	0
	CIT78	21	Alive_tumour-free	0	no	no	0	0.38312	0.366497	0.25	0	1	0	0	1	1	-1	0	2	0	-1	0	-1
	CIT79	1	Alive_tumour-free	0	no	no	0	0.143431	0.294069	0.5	0.0625	1	0	0	0	0	1	0	0	0	0	0	0
	CIT8	39	Death_from_cancer	1	no	yes	0	0.14388	0.606062	0.1875	0.0625	1	0	0	0	0	1	2	1	1	0	-1	-1
	CIT80	5	Death_from_cancer	1	no	yes	0	0.1439	0.6061	0.1875	0.0625	1	0	0	1	0	1	1	0	1	1	-1	0
	CIT81	17	Death_from_cancer	1	no	yes	0.25	0.375	0	0.375	0	1	0	0	1	1	0	0	0	0	0	-2	0
	CIT82	18	Death_from_cancer	1	no	yes	0	0.169665	0.455263	0.25	0.125	1	0	0	1	0	0	-1	1	1	0	-2	-1
	CIT85	22	Alive_tumour-free	0	no	no	0.0625	0.3125	0.0625	0.5	0.0625	0	0	0	0	0	2	0	0	0	0	-2	-1
	CIT86	83	Alive_tumour-free	0	no	no	0	0.322547	0.177453	0.5	0	0	1	0	0	1	0	0	0	0	0	0	0
	CIT90	57	Alive_tumour-free	0	no	no	0	0.143431	0.294069	0.5	0.0625	0	0	0	0	0	0	1	1	0	0	-1	0
	CIT91	9	Alive_tumour-free	0	no	no	0	0.143431	0.294069	0.5	0.0625	1	0	0	0	0	0	1	0	0	0	0	0
	CIT92	52.6	Death_from_cancer	1	yes	yes	0	0.315862	0.184138	0.5	0	0	1	0	0	0	1	0	0	0	0	-2	0
	CIT93	9	Death_from_cancer	1	no	yes	0	0.141169	0.296331	0.5	0.0625	1	0	0	0	0	1	0	0	0	0	0	-2
	CIT94	51.8	Alive_tumour-free	0	no	no	0	0.5	0	0.5	0	0	1	0	1	1	0	0	1	0	-1	-2	1
	CIT96	18	Alive_tumour-free	0	no	no	0	0.1439	0.6061	0.1875	0.0625	1	0	0	1	0	1	0	1	0	0	-1	0
	CIT97	9	Alive_tumour-free	0	no	no	0	0.290381	0.459619	0.25	0	1	1	0	1	0	1	0	0	0	-1	0	0
	CIT98	77	Alive_tumour-free	0	no	no	0	0.14388	0.606062	0.1875	0.0625	0	0	0	0	0	-1	2	1	-1	-1	0	0
	CIT99	23	Death_from_cancer	1	no	yes	0	0.5	0	0.5	0	1	1	0	0	1	-1	0	-1	0	0	-2	0
